# Supplementary material for: Deeply subducted continental fragments – Part 1: Fracturing, dissolution–precipitation, and diffusion processes recorded by garnet textures of the central Sesia Zone (western Italian Alps)
Source: Copernicus journal article supplement (doi:10.5194/se-9-167-2018), 2018-02-26
Supplement: Supplementary file 1 [file se-9-167-2018-supplement.zip]

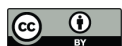

## *Supplement of*

# **Deeply subducted continental fragments – Part 1: Fracturing, dissolution–precipitation, and diffusion processes recorded by garnet textures of the central Sesia Zone (western Italian Alps)**

**Francesco Giuntoli et al.**

*Correspondence to:* Francesco Giuntoli ([francesco.giuntoli@gmail.com](mailto:francesco.giuntoli@gmail.com))

- [se-9-167-2018-supplement-title-page.pdf](#)
- [Supplement.docx](#)

The copyright of individual parts of the supplement might differ from the CC BY 4.0 License.
